# Supplementary material
Source: publisher site journal article supplement (https://www.dovepress.com/article/267828)
Supplement: Supplementary file 1 [file get_supplementary_file.php]

## Supplementary material

### Questionnaire: Knowledge and practices of first aid in the event of road crash among motorcycle-taxi drivers in Cotonou in 2019

ID : / \_\_\_ / \_\_\_ /

Date: / \_\_\_ / \_\_\_ / 2019

Name of the interviewer: / \_\_\_\_\_ / Name of the stand: / \_\_\_\_\_ /

| Questions                                |                                                                                        | Answers                                                                                                                                                                                                                      |
|------------------------------------------|----------------------------------------------------------------------------------------|------------------------------------------------------------------------------------------------------------------------------------------------------------------------------------------------------------------------------|
| <b>SOCIO-DEMOGRAPHIC CHARACTERISTICS</b> |                                                                                        |                                                                                                                                                                                                                              |
| Q1.1                                     | How old were you when you started driving a motorbike taxi?                            | / ___ / ___ / years                                                                                                                                                                                                          |
| Q1.2                                     | How old are you today?                                                                 | / ___ / ___ / years                                                                                                                                                                                                          |
| Q1.3                                     | Sex                                                                                    | a) Male <input type="checkbox"/><br>b) Female <input type="checkbox"/>                                                                                                                                                       |
| Q1.4                                     | What was your level of education when you started working as a motorcycle-taxi driver? | a) No formal education <input type="checkbox"/><br>b) Alphabet <input type="checkbox"/><br>c) Primary <input type="checkbox"/><br>d) Secondary <input type="checkbox"/><br>e) University <input type="checkbox"/>            |
| Q1.5                                     | What is your level of education today?                                                 | a) No formal education <input type="checkbox"/><br>b) Alphabet <input type="checkbox"/><br>c) Primary <input type="checkbox"/><br>d) Secondary <input type="checkbox"/><br>e) University <input type="checkbox"/>            |
| Q1.6                                     | What was your marital status when you started working as a motorcycle-taxi driver?     | a) Married <input type="checkbox"/><br>b) Single <input type="checkbox"/>                                                                                                                                                    |
| Q1.7                                     | What is your current marital status?                                                   | a) Married <input type="checkbox"/><br>b) Single <input type="checkbox"/>                                                                                                                                                    |
| Q1.8                                     | What is your ethnicity?                                                                | a) Fon <input type="checkbox"/><br>b) Adja <input type="checkbox"/><br>c) Bariba <input type="checkbox"/><br>d) Dendi <input type="checkbox"/><br>e) Yoruba <input type="checkbox"/><br>f) Other to be specified / _ _____ / |

| Questions                           |                                                                                        | Answers                                                                                                                                                                                                                                       |
|-------------------------------------|----------------------------------------------------------------------------------------|-----------------------------------------------------------------------------------------------------------------------------------------------------------------------------------------------------------------------------------------------|
| Q1.9                                | What is your religion?                                                                 | a) Catholic <input type="checkbox"/><br>b) Evangelical <input type="checkbox"/><br>c) Protestant <input type="checkbox"/><br>d) Muslim <input type="checkbox"/><br>e) Animism <input type="checkbox"/><br>f) Other to be specified / _____ /  |
| <b>PROFESSIONAL CHARACTERISTICS</b> |                                                                                        |                                                                                                                                                                                                                                               |
| Q2.1                                | When did you start working as a motorcycle-taxi driver?                                | Month    Year<br>/ _____ / _____ /                                                                                                                                                                                                            |
| Q2.2                                | What was your professional situation before becoming a motorcycle-taxi driver?         | a) Unemployment <input type="checkbox"/><br>b) Teacher <input type="checkbox"/><br>c) Cultivator <input type="checkbox"/><br>d) Student <input type="checkbox"/><br>e) Worker <input type="checkbox"/><br>f) Other to be specified / _____ // |
| Q2.3                                | Are you an occasional or permanent motorcycle-taxi driver?                             | a) Occasional <input type="checkbox"/><br>b) Permanent <input type="checkbox"/>                                                                                                                                                               |
| Q2.4                                | What was your other activity in addition to your activity as a motorcycle-taxi driver? | a) Teacher <input type="checkbox"/><br>b) Cultivator <input type="checkbox"/><br>c) Student <input type="checkbox"/><br>d) Worker <input type="checkbox"/><br>e) Other to be specified / _____ /                                              |
| Q2.5                                | How much do you earn on average per day?                                               | a) 0 F CFA <input type="checkbox"/><br>b) 3,000 to 4,999 F CFA <input type="checkbox"/><br>c) 5000 F CFA and more <input type="checkbox"/>                                                                                                    |
| Q2.6                                | Did you have driving licences?                                                         | a) Yes <input type="checkbox"/><br>b) No <input type="checkbox"/>                                                                                                                                                                             |
| Q2.7                                | Which ones (driving licence)?                                                          | Diving licence    Year<br>/ _____ // _____ /<br>/ _____ // _____ /<br>/ _____ // _____ /                                                                                                                                                      |

| Questions                 |                                                                       | Answers                                                    |  |
|---------------------------|-----------------------------------------------------------------------|------------------------------------------------------------|--|
| Q2.8                      | Do you drive other vehicles other than motorbikes?                    | a) Yes <input type="checkbox"/>                            |  |
|                           |                                                                       | b) No <input type="checkbox"/>                             |  |
| Q2.9                      | What other vehicles do you drive?                                     | a) Car <input type="checkbox"/>                            |  |
|                           |                                                                       | b) Tricycle <input type="checkbox"/>                       |  |
|                           |                                                                       | c) Bicycle <input type="checkbox"/>                        |  |
|                           |                                                                       | d) Other to be specified / _____ /                         |  |
| Q2.10                     | Do you have a mobile phone?                                           | a) Yes <input type="checkbox"/>                            |  |
|                           |                                                                       | b) No <input type="checkbox"/>                             |  |
| <b>FIRST AID MEASURES</b> |                                                                       |                                                            |  |
| Q3.1                      | Do you know the emergency number of the Fire Brigade?                 | a) Yes <input type="checkbox"/>                            |  |
|                           |                                                                       | b) No <input type="checkbox"/>                             |  |
| Q3.2                      | If yes, please specify                                                | / _____ /                                                  |  |
| Q3.3                      | Do you know the number of the Police?                                 | a) Yes <input type="checkbox"/>                            |  |
|                           |                                                                       | b) No <input type="checkbox"/>                             |  |
| Q3.4                      | If yes, please specify                                                | / _____ /                                                  |  |
| Q3.5                      | Are you required to provide assistance if you witness a road crash?   | a) Yes <input type="checkbox"/>                            |  |
|                           |                                                                       | b) No <input type="checkbox"/>                             |  |
| Q3.6                      | If so, where does your obligation come from?                          | a) Law of Benin <input type="checkbox"/>                   |  |
|                           |                                                                       | b) Moral obligation <input type="checkbox"/>               |  |
|                           |                                                                       | c) Religious recommendation <input type="checkbox"/>       |  |
|                           |                                                                       | d) Other to be specified / _____ /                         |  |
| Q3.7                      | If not, why is one not obliged to help if one witnesses a road crash? | a) No, Role of the health worker <input type="checkbox"/>  |  |
|                           |                                                                       | b) No, Role of the police officer <input type="checkbox"/> |  |

| Questions |                                                                                       | Answers                                                                                                                                                                                                                                                                                                                                |
|-----------|---------------------------------------------------------------------------------------|----------------------------------------------------------------------------------------------------------------------------------------------------------------------------------------------------------------------------------------------------------------------------------------------------------------------------------------|
| Q3.8      | In your opinion, what is the best way to manage injuries and bleeding?                | a) A tourniquet and raise the limb <input type="checkbox"/><br>b) A bandage or pressure and raise the limb <input type="checkbox"/><br>c) Water, ice <input type="checkbox"/><br>d) Do nothing, let it flow <input type="checkbox"/>                                                                                                   |
| Q3.9      | In case of fracture, what is important to do?                                         | a) Use of splints <input type="checkbox"/><br>b) No use of splints <input type="checkbox"/><br>c) Don't know <input type="checkbox"/>                                                                                                                                                                                                  |
| Q3.10     | In your opinion, what is the appropriate position of a road crash victim on the site? | a) On the side <input type="checkbox"/><br>b) On the back <input type="checkbox"/><br>c) Face down (belly) <input type="checkbox"/>                                                                                                                                                                                                    |
| Q3.11     | When do you think first aid should start?                                             | a) As soon as possible <input type="checkbox"/><br>b) At the hospital <input type="checkbox"/>                                                                                                                                                                                                                                         |
| Q3.12     | In the event of a road crash, what information should the alert message contain?      | a) The telephone number where the caller can be reached<br><input type="checkbox"/><br>b) Description of the crash (number of vehicles involved, number of victims nature of the problem etc.).<br><input type="checkbox"/><br>c) Location, as accurate as possible <input type="checkbox"/><br>d) Don't know <input type="checkbox"/> |
| Q3.13     | In your opinion, when should the victim's helmet be removed?                          | a) In case of cardiac arrest <input type="checkbox"/><br>b) Respiratory distress <input type="checkbox"/><br>c) Unreachable help <input type="checkbox"/><br>d) At any time <input type="checkbox"/><br>e) Don't know <input type="checkbox"/>                                                                                         |
| Q3.14     | Have you ever been informed about first aid?                                          | a) Yes <input type="checkbox"/><br>b) No <input type="checkbox"/>                                                                                                                                                                                                                                                                      |

| Questions |                                                                                                               | Answers                                                                                                                                                                                                                                                                                     |
|-----------|---------------------------------------------------------------------------------------------------------------|---------------------------------------------------------------------------------------------------------------------------------------------------------------------------------------------------------------------------------------------------------------------------------------------|
| Q3.15     | Through which source were you first informed about first aid the first time?                                  | a) Media <input type="checkbox"/><br>b) Newspapers <input type="checkbox"/><br>c) Parent <input type="checkbox"/><br>d) Training <input type="checkbox"/><br>e) Other to be specified / _____ /                                                                                             |
| Q3.16     | Where did this training take place (On what occasion did this training take place)?                           | a) Driving licence training <input type="checkbox"/><br>b) NGO <input type="checkbox"/><br>c) School <input type="checkbox"/><br>d) Military service <input type="checkbox"/><br>e) Vocational training <input type="checkbox"/><br>e) Other to be specified / _____ //                     |
| Q3.17     | When did this training take place (specify the year)?                                                         | / _____ /                                                                                                                                                                                                                                                                                   |
| Q3.18     | Would you be interested in learning how to help in the event of a road crash through training?                | a) Yes <input type="checkbox"/><br>b) No <input type="checkbox"/>                                                                                                                                                                                                                           |
| Q3.19     | If so, why would you be interested in learning how to help in the event of a road crash through training?     | a) Obligation for every citizen to bring help <input type="checkbox"/><br>b) Learn <input type="checkbox"/><br>c) Potential financial benefit of the training <input type="checkbox"/><br>d) Potential for development in the association or trade union hierarchy <input type="checkbox"/> |
| Q3.20     | If not, why wouldn't you be interested in learning how to help in the event of a road crash through training? | a) No interest in the issue<br>b) Cultural considerations to be specified / ___/<br>c) Other to be specified / _____ /                                                                                                                                                                      |

| Questions                                                                                                                                                                    |                                                                                                | Answers                                                                                                                                                                                              |  |
|------------------------------------------------------------------------------------------------------------------------------------------------------------------------------|------------------------------------------------------------------------------------------------|------------------------------------------------------------------------------------------------------------------------------------------------------------------------------------------------------|--|
| <b>ROAD CRASHES BACKGROUND</b>                                                                                                                                               |                                                                                                |                                                                                                                                                                                                      |  |
| <u>Road crash:</u> A collision on the road between the motorcycle-taxi driver's motorbike and any other thing or person that results in human injury and/or material damage. |                                                                                                |                                                                                                                                                                                                      |  |
| Q4.1                                                                                                                                                                         | Have you ever witnessed a road crash before being a motorbike taxi driver?                     | a) Yes <input type="checkbox"/><br>b) No <input type="checkbox"/>                                                                                                                                    |  |
| Q4.2                                                                                                                                                                         | Have you ever been involved in a road crash before being a motorbike taxi driver?              | a) Yes <input type="checkbox"/><br>b) No <input type="checkbox"/>                                                                                                                                    |  |
| Q4.3                                                                                                                                                                         | Have you ever witnessed a road crash after starting your activity as a motorcycle-taxi driver? | a) Yes <input type="checkbox"/><br>c) No <input type="checkbox"/>                                                                                                                                    |  |
| Q4.4                                                                                                                                                                         | Have you tried to alert?                                                                       | a) Yes <input type="checkbox"/><br>b) No <input type="checkbox"/>                                                                                                                                    |  |
| Q4.5                                                                                                                                                                         | If not, why didn't you try to alert?                                                           | a) No possession of a mobile <input type="checkbox"/><br>b) No knowledge of the number emergency <input type="checkbox"/><br>c) Other to be specified / _____ //                                     |  |
| Q4.6                                                                                                                                                                         | Were you able to alert?                                                                        | a) Yes <input type="checkbox"/><br>b) No <input type="checkbox"/>                                                                                                                                    |  |
| Q4.7                                                                                                                                                                         | What was the content of your alert message?                                                    | a) Number of vehicles involved <input type="checkbox"/><br>b) Number of victims <input type="checkbox"/><br>c) Location of the crash <input type="checkbox"/><br>d) Other to be specified / _____ // |  |
| Q4.8                                                                                                                                                                         | Did the Police/Fire Brigade come to the scene?                                                 | a) Yes <input type="checkbox"/><br>b) No <input type="checkbox"/>                                                                                                                                    |  |
| Q4.9                                                                                                                                                                         | If not why, were you not able to alert?                                                        | a) Not free of charge <input type="checkbox"/><br>b) Line congestion <input type="checkbox"/><br>c) Unaccessible number <input type="checkbox"/><br>d) Others to be specified / _____ /              |  |
| Q4.10                                                                                                                                                                        | Have you sought rescue?                                                                        | a) Yes <input type="checkbox"/><br>b) No <input type="checkbox"/>                                                                                                                                    |  |

| Questions |                                                                               | Answers                                                         |  |
|-----------|-------------------------------------------------------------------------------|-----------------------------------------------------------------|--|
| Q4.11     | If not, why didn't you try to help?                                           | a) Is not part of my attributions <input type="checkbox"/>      |  |
|           |                                                                               | b) Non-knowledge of gestures first aid <input type="checkbox"/> |  |
|           |                                                                               | c) Fears of worsening of the situation <input type="checkbox"/> |  |
|           |                                                                               | d) Others / _____ /                                             |  |
| Q4.12     | Were you able to provide some first aid gestures?                             | a) Yes <input type="checkbox"/>                                 |  |
|           |                                                                               | b) No <input type="checkbox"/>                                  |  |
| Q4.13     | If not, why were you unable to help?                                          | a) Absence of first aid kit rescue <input type="checkbox"/>     |  |
|           |                                                                               | b) Peer demotivation <input type="checkbox"/>                   |  |
|           |                                                                               | c) Other to be specified / _____ //                             |  |
| Q4.14     | Have you ever had a road crash after starting out as a motorbike taxi driver? | a) Yes <input type="checkbox"/>                                 |  |
|           |                                                                               | b) No <input type="checkbox"/>                                  |  |
| Q4.15     | If so, how many times?                                                        | / _____ / times                                                 |  |
| Q4.16     | Has any of these crashes occurred in the last 12 months?                      | a) Yes <input type="checkbox"/>                                 |  |
|           |                                                                               | b) No <input type="checkbox"/>                                  |  |
| Q4.17     | Did anyone die in this crash?                                                 | a) Yes <input type="checkbox"/>                                 |  |
|           |                                                                               | b) No <input type="checkbox"/>                                  |  |
| Q4.18     | Were you rescued in this crash                                                | a) Yes <input type="checkbox"/>                                 |  |
|           |                                                                               | b) No <input type="checkbox"/>                                  |  |
| Q4.19     | Who rescued you after this road crash?                                        | a) Police <input type="checkbox"/>                              |  |
|           |                                                                               | b) Fire Brigade <input type="checkbox"/>                        |  |
|           |                                                                               | c) Health Worker <input type="checkbox"/>                       |  |
|           |                                                                               | d) Nobody <input type="checkbox"/>                              |  |
|           |                                                                               | e) Other to be specified / _____                                |  |

**Thank you for your participation**
